# Supplementary material for: The Relationship between Clock Genes, Sirtuin 1, and Mitochondrial Activity in Head and Neck Squamous Cell Cancer: Effects of Melatonin Treatment
Source: MDPI journal article supplement (doi:10.3390/ijms241915030), 2023-10-09
Supplement: s1 [file s1]

SUPPLEMENTARY FILES (FIGURES AND TABLES)

Figure S1

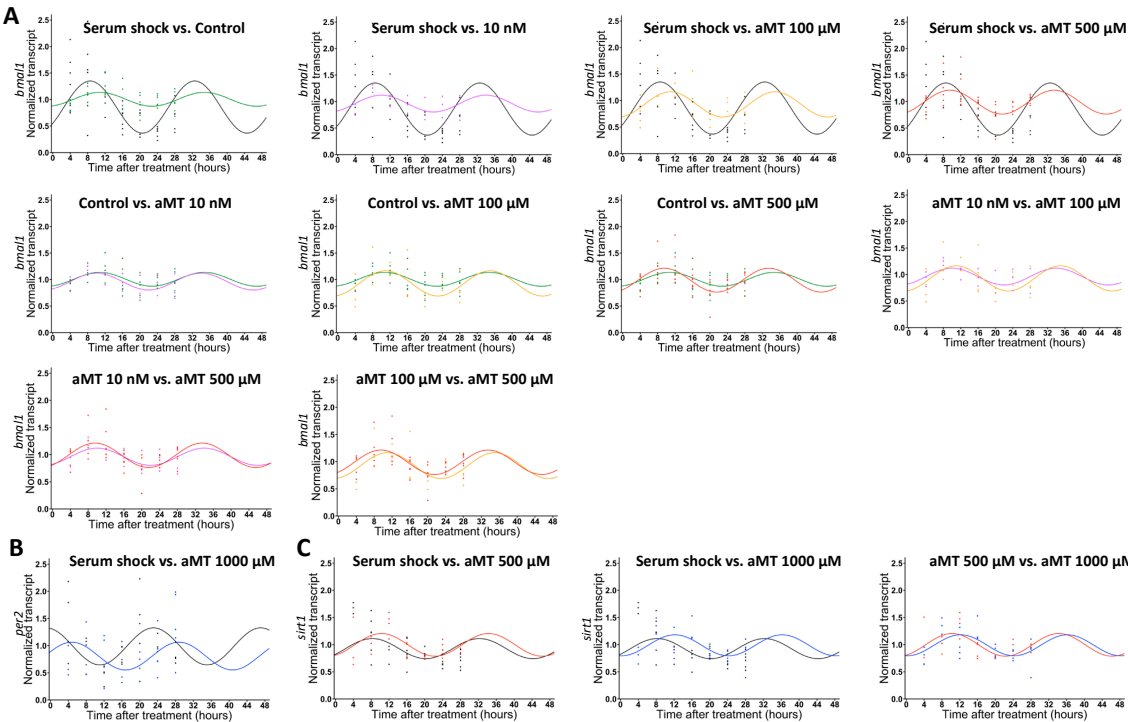

Figure S2

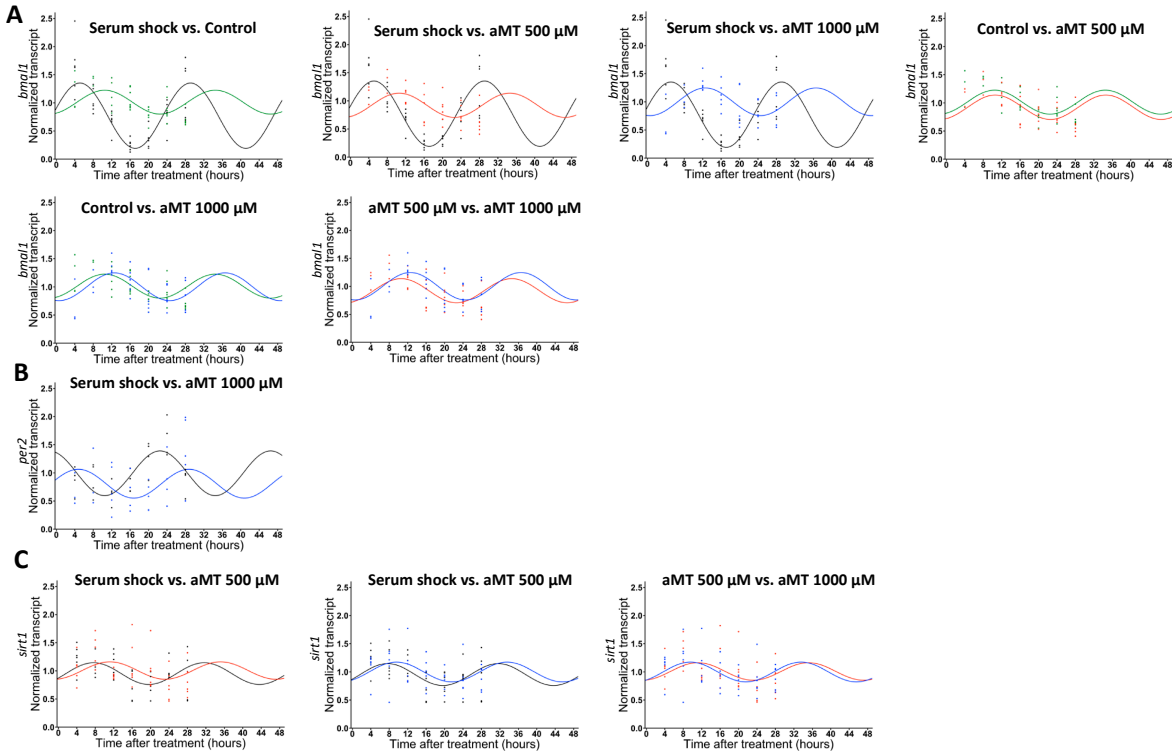

Table S1

| Treatment       | Presence of rhythmicity<br>(p-value) | Acrophase | Amplitude |
|-----------------|--------------------------------------|-----------|-----------|
| aMT 10 nM       | <0.05                                | 9.981817  | 0.158323  |
| aMT 100 $\mu$ M | <0.05                                | 10.95637  | 0.238408  |

Table S2

| Comparison                          | P-value for<br>acrophase difference | P-value for amplitude<br>difference |
|-------------------------------------|-------------------------------------|-------------------------------------|
| Serum shock vs. aMT 10 nM           | ns<br>(0.614919)                    | <0.05<br>(0.037591)                 |
| Serum shock vs. aMT 100 $\mu$ M     | ns<br>(0.198786)                    | ns<br>(0.119811)                    |
| Control vs. aMT 10 nM               | ns<br>(0.657939)                    | ns<br>(0.718146)                    |
| Control vs. aMT 100 $\mu$ M         | ns<br>(0.908333)                    | ns<br>(0.241201)                    |
| aMT 10 nM vs. aMT 100 $\mu$ M       | ns<br>(0.6226)                      | ns<br>(0.474727)                    |
| aMT 10 nM vs. aMT 500 $\mu$ M       | ns<br>(0.783253)                    | ns<br>(0.445071)                    |
| aMT 100 $\mu$ M vs. aMT 500 $\mu$ M | ns<br>(0.299178)                    | ns<br>(0.898303)                    |

Figure S3

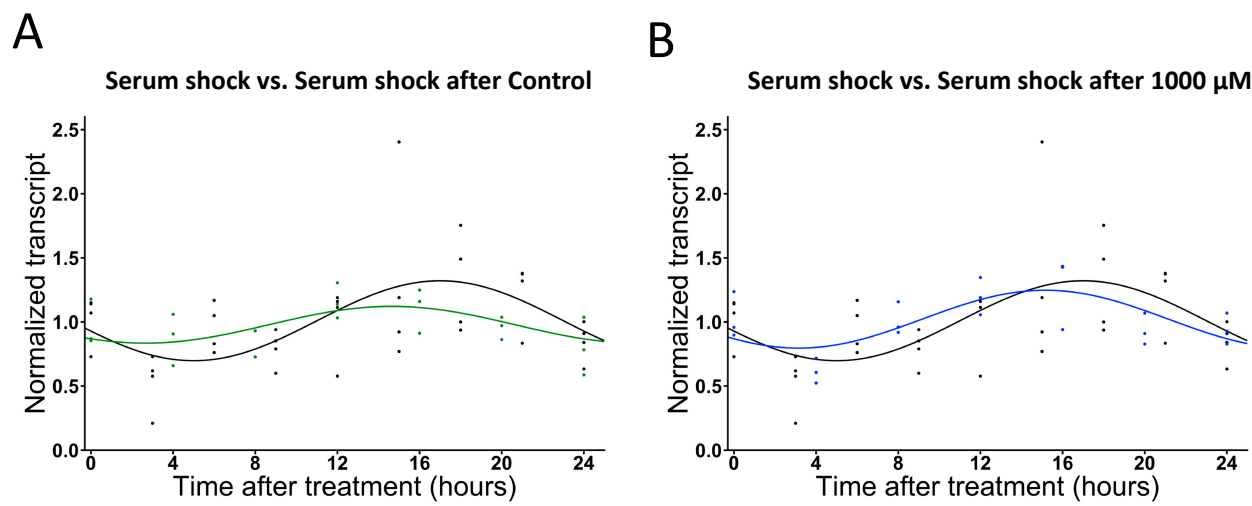

## LEGENDS FOR SUPPLEMENTARY FIGURES

**Figure S1.** Cal-27 Cosinor's best fits comparison of gene expression between different experimental groups. (A) *bmal1*; (B) *per2*; (C) *sirt1*. Serum shock (black), control (green) and aMT 10 nM (purple), 100  $\mu$ M (orange), 500  $\mu$ M (red) and 1000  $\mu$ M (blue) treatments; n= 3-6 independent experiments.

**Figure S2.** SCC9 Cosinor's best fits comparison of gene expression between different experimental groups. (A) *bmal1*; (B) *per2*; (C) *sirt1*. Serum shock (black), control (green) and aMT 500  $\mu$ M (red) and 1000  $\mu$ M (blue) treatments; n= 3-6 independent experiments.

**Table S1.** Cosinor analysis of relative expression of the clock gene Bmal1 in HNSCC cell line Cal-27 after aMT treatments (10 nM and 100  $\mu$ M).

**Table S2.** Circadian rhythm comparison of relative expression of the clock genes Bmal1 in HNSCC cell line Cal-27. \* p<0.05.

**Figure S3.** Cosinor's best fits comparison of OCR between different experimental groups. (A) Serum shock treatment (black) *versus* serum shock after control treatment (green); (B) serum shock treatment (black) *versus* serum shock after melatonin 1000  $\mu$ M treatment (blue); n= 3-6 independent experiments.
